1 The influence of prenatal alcohol exposure and maternal diet on offspring DNA  
2 methylation: a cross-species study

3 Mitchell Bestry<sup>1</sup>, Alexander N. Larcombe<sup>2,3</sup>, Nina Kresoje<sup>4</sup>, Emily K Chivers<sup>2</sup>, Chloe  
4 Bakker<sup>2</sup>, James P Fitzpatrick<sup>5</sup>, Elizabeth J Elliott<sup>6,7</sup>, Jeffrey M Craig<sup>8,9,10</sup>, Evelyne Muggli<sup>9,10</sup>,  
5 Jane Halliday<sup>10,11</sup>, Delyse Hutchinson<sup>11,12,13,14</sup>, Sam Buckberry<sup>4,15,16</sup>, Ryan Lister<sup>15,16</sup>, Martyn  
6 Symons<sup>1,17</sup>, David Martino<sup>1,18</sup>.

- 7 1. *Telethon Kids Institute, The University of Western Australia, Perth, Australia.*
- 8 2. *Respiratory Environmental Health, Wal-yan Respiratory Research Centre, Telethon*  
9 *Kids Institute, Nedlands, Western Australia, Australia.*
- 10 3. *Occupation, Environment and Safety, School of Population Health, Curtin University,*  
11 *Perth, Western Australia.*
- 12 4. *Telethon Kids Institute, 15 Hospital Ave, Nedlands, Western Australia, Australia.*
- 13 5. *School of Psychological Sciences, University of Western Australia, Perth, Australia.*
- 14 6. *University of Sydney, Faculty of Medicine and Health, Specialty of Child and*  
15 *Adolescent Health, Sydney, NSW 2006, Australia.*
- 16 7. *Sydney Children's Hospitals Network (Westmead) and Kids Research, Sydney, NSW*  
17 *2145, Australia.*
- 18 8. *Deakin University, IMPACT – the Institute for Mental and Physical Health and Clinical*  
19 *Translation, School of Medicine, Geelong, Australia.*
- 20 9. *Murdoch Children's Research Institute, Royal Children's Hospital, Flemington Road,*  
21 *Parkville, Victoria 3052, Australia.*
- 22 10. *Department of Paediatrics, University of Melbourne, Royal Children's Hospital,*  
23 *Flemington Road, Parkville, Victoria 3052, Australia.*

- 24 11. *Public Health Genetics, Murdoch Children's Research Institute, Parkville, VIC,*  
25 *Australia.*
- 26 12. *Deakin University, School of Psychology, Faculty of Health, Geelong, Australia.*
- 27 13. *Murdoch Children's Research Institute, Centre for Adolescent Health, Royal*  
28 *Children's Hospital, Melbourne, Australia.*
- 29 14. *University New South Wales, National Drug and Alcohol Research Centre, Sydney,*  
30 *Australia.*
- 31 15. *Harry Perkins Institute of Medical Research, QEII Medical Centre and Centre for*  
32 *Medical Research, The University of Western Australia, Perth, WA 6009, Australia.*
- 33 16. *ARC Centre of Excellence in Plant Energy Biology, School of Molecular Sciences,*  
34 *The University of Western Australia, Perth, WA 6009, Australia.*
- 35 17. *National Drug Research Institute, enAble Institute, Curtin University.*
- 36 18. *Wal-yan Respiratory Research Centre, Telethon Kids Institute, Nedlands, Western*  
37 *Australia, Australia.*

38 Corresponding author: David Martino

39 Corresponding author email: [david.martino@uwa.edu.au](mailto:david.martino@uwa.edu.au)

40 Corresponding author telephone: +61 8 6319 1635

41 Corresponding author mailing address: 35 Stirling Highway Crawley WA 6009 Australia

## 42 **Abstract**

43 Alcohol consumption in pregnancy can affect genome regulation in the developing offspring  
44 but results have been contradictory. We employed a physiologically relevant murine model of  
45 short-term moderate prenatal alcohol exposure (PAE) resembling common patterns of alcohol  
46 consumption in pregnancy. Moderate early PAE was sufficient to affect site-specific DNA  
47 methylation in new-born pups without altering behavioural outcomes in adult littermates.

48 Whole genome-bisulphite sequencing of neonatal brain and liver revealed stochastic influence  
49 on DNA methylation that was mostly tissue-specific, with some perturbations likely originating  
50 as early as gastrulation. Methylation changes were enriched in non-coding genomic regions  
51 with regulatory potential indicative of broad effects of alcohol on genome regulation.  
52 Replication studies in human cohorts with fetal alcohol spectrum disorder suggested some  
53 effects were metastable at genes linked to disease-relevant traits including facial morphology,  
54 intelligence, educational attainment, autism, and schizophrenia. A maternal diet high in folate  
55 and choline protected against some of the damaging effects of PAE on DNA methylation. Our  
56 studies demonstrate that moderate early exposure is sufficient to affect fetal genome regulation  
57 even in the absence of overt phenotypic changes and highlight a role for preventative maternal  
58 dietary interventions.

59

60

## 61 **Keywords**

62 Prenatal alcohol exposure, fetal alcohol spectrum disorder, DNA methylation, methylome,  
63 epigenetics

64

## 65 **Introduction**

66 Alcohol consumption in pregnancy is the most common preventable cause of  
67 neurodevelopmental impairments in children (1). Alcohol can pass through the placenta acting  
68 as a teratogen in fetal tissues causing physical, cognitive, behavioural, and neurodevelopmental  
69 impairment in children at high doses with lifelong consequences for health. Fetal Alcohol  
70 Spectrum Disorder (FASD) and Fetal Alcohol Syndrome (FAS) can arise at binge levels of  
71 exposure, although not always at lower levels of exposure. Whether PAE is sufficient to induce

72 overt physiological abnormalities depends on multiple environmental and genetic factors  
73 including the dose and timing of alcohol use during pregnancy, maternal diet, smoking, stress,  
74 and potentially other factors that collectively influence fetal outcomes (2-4).

75         Patterns of alcohol consumption in pregnancy vary, but epidemiological surveys  
76 suggest most women in Western countries consume moderate to high levels between  
77 conception until recognition of pregnancy (5), after which time consumption largely ceases,  
78 apart from occasional use (6). While the effects of binge-levels of exposure are well  
79 documented to cause FASD, more subtle effects that reflect the more common patterns of  
80 drinking are unclear and more research is needed to support public health initiatives to reduce  
81 alcohol consumption in pregnancy.

82         Studies suggest alcohol can disrupt fetal gene regulation through epigenetic  
83 mechanisms. DNA methylation is one epigenetic mechanism involving the catalytic addition  
84 of methyl groups to cytosines bases within cytosine-guanine (CpG) dinucleotide motifs during  
85 one-carbon metabolism. Methylation of DNA can alter chromatin density and influence  
86 patterns of gene expression in a tissue-specific and developmentally appropriate manner and  
87 disruption to this process may cause of some of the difficulties experienced by people with  
88 FASD (7, 8). Previous studies on human participants (9-11) and animals (12-14) report alcohol  
89 can disrupt DNA methylation either globally (11-13), and/or at specific gene regions (10, 13,  
90 14). Our recent systematic review however found limited replication of effects between studies  
91 suggesting the effects of alcohol on DNA methylation may be stochastic and influenced by  
92 numerous confounding factors (15). PAE can either directly inhibit DNA methyltransferase  
93 enzymes or disrupt one-carbon metabolism via inhibition of bioavailability of dietary methyl  
94 donors, such as folate and choline to the fetus (16) (17). Choline in particular has been explored  
95 in several clinical trials to reduce cognitive deficits caused by PAE in affected individuals (18,  
96 19), or when administered during pregnancy (20, 21), with encouraging results.

97           Given the lack of clarity around the effects of typical patterns of alcohol consumption,  
98   which often do not cause observable phenotypes, we conducted an epigenome-wide association  
99   study of early moderate PAE in mice with replication in human cohorts. The study was a  
100   controlled intervention investigating the impact of PAE on offspring DNA methylation  
101   comparing exposed and unexposed mice, with an additional arm comparing the effect of  
102   alcohol exposure in the context of a high methyl donor maternal diet. The exposure period  
103   covers the equivalent of pre-conception up until the first trimester in humans when neurulation  
104   occurs, reflecting a typical situation in which women may consume alcohol up until pregnancy  
105   recognition (22). The primary outcome of the study was changes in offspring DNA methylation  
106   and secondary outcomes of behavioural deficits across neurodevelopmental domains relevant  
107   to FASD were also examined. We employed whole genome bisulfite sequencing (WGBS) for  
108   unbiased assessment of the epigenome in newborn brain and liver, two target organs affected  
109   by ethanol (23), to explore tissue-specificity of effects and to determine any ‘tissue agnostic’  
110   effects which must have arisen prior to the germ-layers separating in early gastrulation.

111

## 112   **Results**

### 113   *Comparison of prenatal characteristics across treatment groups*

114   To investigate the effects of PAE and HMD on offspring DNA methylation and behavioural  
115   outcomes, we employed a murine model with four treatment groups (Figure 1). The trajectory  
116   of weight gain during pregnancy was similar across all treatment groups with some evidence  
117   of more rapid weight gain in the HMD groups in the last 2 days (Linear mixed effects regression  
118   model; H<sub>2</sub>O-HMD:  $-2.282 \pm 0.918$  g,  $P = 0.0177$ ; PAE-HMD:  $-1.656 \pm 0.814$  g,  $P = 0.0493$ ;  
119   figure S1a), although the total amount of weight gained between days 1 and 17-19 was not  
120   significantly different between treatment groups by linear mixed effects regression (Figures

121 S1a-b). The total amount of liquid consumed over the course of pregnancy was significantly  
122 lower in HMD dams by unpaired t-test (Figures S1b and S2c). There was no significant  
123 difference in the average litter size ( $6.525 \pm 0.297$  pups, figure S1c) and pup sex ratios (Figure  
124 S1d) between treatment groups by unpaired t-test.

125 *Effects of PAE and HMD on behavioural outcomes in adult mice*

126 Behavioural testing was carried out on adult mice from each study group. There was no  
127 evidence that PAE had a significant effect on any of behavioural outcomes tested (Figure S3).  
128 Mice exposed to HMD exhibited greater locomotor activity, in terms of distance travelled  
129 (Figure 2).

130 *Effects of PAE on DNA methylation in newborn mice tissue.*

131 Whole-genome bisulfite sequencing (WGBS) of brain and liver samples from 16 newborn pups  
132 was performed to determine the effects of PAE on fetal DNA methylation. Global levels of  
133 DNA methylation stratified across different genomic features were preserved across treatment  
134 conditions, with no major differences in average methylation content between groups (Figure  
135 S4). To investigate region-specific effects of PAE on newborn DNA methylation, we  
136 conducted genome-wide testing comparing exposed and un-exposed mice on the normal chow.  
137 We identified 78 differentially methylated regions (DMRs) in the brain and 759 DMRs in the  
138 liver ( $P < 0.05$  and  $\Delta > 0.05$ ) from ~19,000,000 CpG sites tested after coverage filtering  
139 (Figure 3a-b). These regions were annotated to nearby genes using *annotatr* and are provided  
140 in Tables S1-2. Two of the DMRs overlapped in mouse brain and liver (tissue agnostic), but  
141 the remainder were tissue specific. Among these tissue agnostic regions was the *Impact* gene  
142 on chromosome 18, which was hypomethylated in PAE+NC mice compared to H<sub>2</sub>O+NC mice  
143 in both the brain and liver (Figure 3c-d). The other tissue agnostic region was within 5kb  
144 downstream of *Bmf* and was hypermethylated in brain and liver tissue of PAE+NC mice.

145 In both tissues, hypomethylation with PAE in NC mice was more frequently observed in DMRs  
146 (52.6% of DMRs in brain, 93.5% of DMRs in liver hypomethylated with PAE) compared to  
147 hypermethylation. Some DMRs localised to the same genes in both brain and liver, although  
148 they were different regions. The three genes affected by PAE in both brain and the liver tissues  
149 were the Autism Susceptibility Gene 2 (*Auts2*), Androglobin (*Adgb*), and RNA Binding Protein  
150 Fox 1 (*Rbfox1*) genes (Table 1). In both brain and liver tissues, DMRs were enriched in non-  
151 coding intergenic and open sea regions and relatively underrepresented in coding and CpG  
152 island regions (Figure 3e-f). Using open chromatin assay and histone modification datasets  
153 from the ENCODE project, we found overwhelming enrichment ( $p < 0.05$ ) of DMRs in open  
154 chromatin regions (ATAC-seq), enhancer regions (H3K4me1), and active gene promoter  
155 regions (H3K27ac), in mouse fetal forebrain tissue and fetal liver (Table 2). Gene ontology  
156 enrichment analysis of liver DMRs that did localise to genes showed enrichment in ten  
157 predominantly neuronal pathways, with neuron projection being the most significant (Figure  
158 3g, Tables S3-4).

### 159 *HMD mitigates the effects of PAE on DNA methylation*

160 To determine whether administration of a HMD throughout pregnancy could mitigate the  
161 effects of PAE on offspring DNA methylation, we examined alcohol sensitive DMRs in the  
162 HMD mice. Compared to control mice, PAE+HMD mice exhibited methylation differences in  
163 only 12/78 (15%) brain (Table S7), and 124/759 (16%) liver (Table S8) DMRs, suggesting the  
164 effects were predominantly mitigated. Effect sizes compared to mice on the normal chow were  
165 substantially lower, in some cases more than 25% reduced in mice on the high methyl donor  
166 diet (Figure 4).

### 167 *Replication studies in Human PAE and FASD case-control cohorts*

168 We undertook validation studies in human cohorts to address the generalizability of our murine  
169 model of PAE. Only 36 of the 78 (46.2%) brain DMRs, and 294 of the 759 (38.8%) liver  
170 DMRs, had homologous regions in the human genome and were able to be tested. DNA  
171 methylation array data from 147 newborns buccal swabs from the Asking Questions About  
172 Alcohol in Pregnancy (AQUA) cohort (40) was available for analysis. We tested a total of  
173 1,898 CpG sites that corresponded to mouse DMRs, comparing ‘never exposed’ newborns to  
174 ‘any exposure’ and found no evidence of differential methylation at these CpG (data not  
175 shown). We also accessed publicly available DNA methylation array measurements from  
176 buccal swabs taken from a Canadian clinical cohort of children with diagnosed FASD, and  
177 controls. To avoid confounding due to ancestry we analysed the 118 Caucasian individuals (30  
178 FASD and 88 controls). Testing a total of 2,316 CpG sites that were homologous to mouse  
179 DMRs we statistically replicated 7 DMR associations with FASD status (FDR  $P < 0.05$ ) after  
180 adjusting for participant age, sex, array number, and estimated cell counts (Table 3). Visual  
181 comparison of methylation changes across these seven DMRs revealed striking differences in  
182 effect sizes between people with FASD and mice (Figure 5). Genes associated with these  
183 DMRs are linked to clinically relevant traits in the GWAS catalogue including facial  
184 morphology (*GADD45A* (41)), educational attainment (*AP2B1* (42)), intelligence (*RP9* (43)),  
185 autism and schizophrenia (*ZNF823* (44)).

#### 186 *Candidate Gene Analysis of previously defined alcohol sensitive regions.*

187 In candidate gene studies there were 21 CpG sites (FDR<0.05) identified in the brain from  
188 15,132 CpG sites tested, including two sites in the *Mest* (*Peg1*) gene and 19 sites in *Kcnq1*  
189 (*KvDMR1*) (Table S9). There were nine FDR-significant CpG sites identified in the liver out  
190 of 15,382 CpG sites tested, all of which were in *Peg3* (Table S10). All FDR-significant CpG  
191 sites identified in both tissues were hypomethylated in mice with PAE.



## 192 Discussion

193 In this study, found that moderate early (first trimester) PAE was sufficient to induce site-  
194 specific differences to DNA methylation in newborn pups without causing overt behavioural  
195 outcomes in adult mice. Global levels of DNA methylation were not significantly different  
196 with PAE, and effects were characterized predominantly by a loss of methylation  
197 (hypomethylation), mostly at non-coding regions of the genome. In our model, alcohol's effects  
198 on DNA methylation were predominantly tissue-specific, with only two genomic regions and  
199 four genes that were similarly affected in both tissues. These perturbations must have arisen  
200 before the germ layers separated suggesting alcohol can perturb methylation events as early as  
201 gastrulation. In general, DMRs were enriched in non-coding regions of the genome with  
202 regulatory potential suggesting alcohol may have broad effects on genome regulation.

203 Both the human validation studies and the candidate gene analysis provide validity to our  
204 model for recapitulating some of the genomic disturbances reported in patients with clinical  
205 FASD. It is remarkable that associations were reproduced despite differences in biosamples  
206 and species and suggests that at least some methylation changes are stable over time. We  
207 replicated associations from published reports of hypomethylation within *Peg3* and *KvDMR1*  
208 from South African children with fetal alcohol syndrome (10). Both these genes are methylated  
209 in a parent-of-origin specific manner, suggesting that alcohol may affects imprinting processes,  
210 although results are not entirely consistent (45, 46). On the balance of this, we speculate  
211 duration of exposure, dose, and other tissue-related factors all likely influence the extent to  
212 which genome-regulation is perturbed and manifests as differences in DNA methylation.

213 Our results are encouraging for biomarker studies and aid in the prioritisation of associations  
214 for future follow-up, particularly in relation to diagnosis of FASD. For example, three genes  
215 are zinc finger proteins (*RP9*, *PEX12*, and *ZNF823*) that play an important role in fetal gene

216 regulation. Notably, *PEX12* is associated with Zellweger syndrome, which is a rare peroxisome  
217 biogenesis disorder (the most severe variant of Peroxisome biogenesis disorder spectrum),  
218 characterized by neuronal migration defects in the brain, dysmorphic craniofacial features,  
219 profound hypotonia, neonatal seizures, and liver dysfunction (47).

220 Another key finding from this study was that HMD mitigated some of the effects of PAE on  
221 DNA methylation. Preclinical studies of choline supplementation in rodent models have  
222 similarly reported attenuation of memory and behavioural deficits associated with PAE (48,  
223 49), and mitigating effects on DNA methylation (50). These data have been largely consistent  
224 and collectively support the notion that alcohol induced perturbation of epigenetic regulation  
225 may occur, at least in part, through disruption of the one-carbon metabolism. The most  
226 encouraging aspect of this relates to the potential utility for evidence-informed  
227 recommendations for dietary advice or supplementation, particularly in population groups with  
228 limited access to antenatal care or healthy food choices.

229 Strengths of this study include the use of controlled interventions coupled with comprehensive  
230 assessment of the effects of PAE on multiple tissues. Caveats include a limited ability to  
231 determine the contribution of specific cell types within tissues to the methylation differences  
232 observed, and we did not assess markers of brain or liver physiology.

233 In conclusion, this study demonstrates that early moderate PAE can disturb fetal gene  
234 regulation and supports current public health advice that alcohol consumption during  
235 pregnancy, even at low doses, may be harmful.

236

## 237 **Materials and Methods**

238 *Murine subjects and housing*

239 To study the effects of PAE on offspring DNA methylation processes, we adapted a murine  
240 model study design that has previously reported DNA methylation changes at the A<sup>vy</sup> locus in  
241 Agouti mice (24) (Figure 1). This study received animal ethics approval from the Telethon  
242 Kids Institute Animal Ethics Committee (Approval Number: 344). Sixty nulliparous C57BL/6J  
243 female mice aged ~8 weeks were mated with equivalent stud male mice. Pregnant dams were  
244 randomly assigned to one of four treatment groups (n = 15 dams per group) that varied based  
245 on composition of the drinking water and chow given to the dams:

- 246 i. PAE-NC (Prenatal Alcohol Exposure-Normal Chow): 10% (v/v) ethanol in non-  
247 acidified water *ad libitum* from 10 days prior to mating until gestational days (GD) 8-  
248 10. This is intended to replicate typical patterns of drinking during the first trimester of  
249 pregnancy in humans. Dams received non-acidified reverse osmosis water for the  
250 remainder of pregnancy and normal chow (Rat and Mouse Cubes, Speciality Feeds,  
251 Glen Forrest, Australia) throughout pregnancy.
- 252 ii. PAE-HMD (Prenatal Alcohol Exposure-High Methyl Donor diet): 10% (v/v) ethanol  
253 in non-acidified water *ad libitum* from 10 days prior to mating until GD8-10 and non-  
254 acidified reverse osmosis water for remainder of pregnancy. Isocaloric high methyl  
255 donor (HMD) chow consisting of 20 mg/kg folate and 4,970 mg/kg choline throughout  
256 pregnancy (Speciality Feeds, Glen Forrest, Australia).
- 257 iii. H<sub>2</sub>O-NC (Water-Normal Chow): non-acidified water and normal chow throughout  
258 pregnancy.
- 259 iv. H<sub>2</sub>O-HMD (Water-High Methyl Donor diet): non-acidified water and HMD chow  
260 throughout pregnancy.

261

262 *Whole-genome bisulfite sequencing of newborn mouse tissues*

263 Pups selected for WGBS in each intervention group were matched on sex and litter size to  
264 minimize variability in exposure. Two male and two female pups per treatment group (n = 16  
265 total) were euthanised by intraperitoneal injection with ketamine and xylazine on the day of  
266 birth for WGBS of their brain and liver tissues. Mouse tissue samples were stored at -80°C.  
267 Remaining littermates grew until adulthood for behavioural testing. Ten milligrams of tissue  
268 were collected from each liver and brain. Total nucleic acid was extracted from the tissues  
269 using the Chemagic 360 instrument (PerkinElmer) and quantified with Qubit DNA High  
270 Sensitivity Kit (Catalogue Number: Q32854, Thermo Scientific). 100 ng of genomic DNA was  
271 spiked with 0.5 ng of unmethylated lambda DNA (Catalogue Number: D1521, Promega) to  
272 assess the bisulfite conversion efficiency. Each sample was digested with 2 µl RNase A  
273 (Invitrogen) at 37°C for 20 minutes to remove RNA. 100 ng of genomic DNA from each sample  
274 was sheared using a Covaris M220 (300bp settings, Covaris). Libraries were prepared using  
275 the Lucigen NxSeq AmpFREE Low DNA Library Kit (Catalogue Number: 14000-1, Lucigen),  
276 according to the manufacturer's instructions. Nextflex bisulfite-seq barcodes (Catalogue  
277 Number: Nova-511913, PerkinElmer) were used as the adapters with incubation at 25°C for 30  
278 minutes. The libraries were bisulfite converted using the Zymo EZ DNA Methylation-Gold Kit  
279 (Catalogue Number: D5005, Zymo Research) and PCR amplified using the KAPA HiFi Uracil  
280 PCR Kit (Catalogue Number: ROC-07959052001, Kapa Biosystems). The final libraries were  
281 assessed with the Agilent 2200 TapeStation System using D1000 Kit (Catalogue Number: 5067-  
282 5582). WGBS was performed by Genomics WA sequencing core on a NovaSeq 6000  
283 (Illumina) using 2x150bp chemistry on an S4 flow cell. The bisulfite conversion rate in each  
284 tissue sample was at least 99%. The overall mean coverage in each sample was 9.69x (range:  
285 6.51-12.12x).

286 *Behavioural testing in adult mice*

287 Littermates who were not sacrificed at birth were reared on normal chow and drinking water  
288 *ad libitum* until adulthood (~8 weeks after birth) when they underwent behavioural tests  
289 assessing five neurodevelopmental domains that can be affected by PAE including locomotor  
290 activity, anxiety, spatial recognition, memory, motor coordination and balance. These tests  
291 included the open field test (locomotor activity, anxiety) (25), object recognition test  
292 (locomotor activity, spatial recognition) (26), object in place test (locomotor activity, spatial  
293 recognition) (27), elevated plus maze test (locomotor activity, anxiety) (28), and two trials of  
294 the rotarod test (motor coordination, balance) (29). Between mouse subjects, behavioural  
295 testing equipment was cleaned with 70% ethanol. Video recording was employed for all  
296 behavioural tests, except for the rotarod, and the assessment process was semi-automated using  
297 ANY-maze software (Stoelting Co., Wood Dale, Illinois, U.S.A.).

298

### 299 *Statistical analysis*

300 Dam characteristics and pup behavioural testing results were generally assessed using unpaired  
301 t-tests comparing each treatment group to the baseline control group that was given non-  
302 acidified reverse osmosis water and normal chow throughout pregnancy. Trajectories of liquid  
303 consumption and weight gain across pregnancy, which were assessed using a quadratic mixed  
304 effects model and the trajectory of chow consumption across pregnancy which was assessed  
305 using a linear mixed effects model. Raw fastq files were mapped to the mm10 mouse reference  
306 genome with BSseeker 2 (version 2.1.8) (30) and CG-maptools (version number 0.1.2) (31)  
307 using a custom bioinformatics pipeline. CGmap output files were combined as a bsseq object  
308 in the R statistical environment (32). We filtered the X chromosomal reads and then combined  
309 reads from mice in the same treatment group using the *collapseBSseq* function, to maximise  
310 coverage prior to differential methylation analysis. CpG sites with an aggregated coverage

311 below 10x in each tissue type were removed prior to modelling to ensure there was sufficient  
312 coverage in all assessed CpG sites. This retained 94.9% of CpG sites in the brain and 93.8% of  
313 CpG sites in the liver. Differentially methylated regions (DMRs) were identified within each  
314 tissue using a Bayesian hierarchical model comparing exposed and unexposed groups using  
315 the Wald test with smoothing, implemented in the R package *DSS* (33). We declared DMRs as  
316 those with P-value < 0.05 based on the p-values of each individual CpG site in the DMR, and  
317 an effect size (delta) > 0.05. Gene ontology analysis was performed on the brain and liver  
318 DMRs using the Gene Set Enrichment Analysis computational method (34) to determine if the  
319 DMRs were associated with any transcription start sites or biological processes. Brain and liver  
320 DMRs were tested for enrichment within ENCODE Project data sets (35) by an overlap  
321 permutation test with 100 permutations using the *regioneR* package. The ENCODE Project  
322 data sets that were assessed included ENCFF845WSI, ENCFF764NTQ, ENCFF937JHP,  
323 ENCFF269TLO, ENCFF676TSV and ENCFF290MLR. DMRs were then tested for  
324 enrichment within specific genic and CpG regions of the mouse genome, compared to a  
325 randomly generated set of regions in the mouse genome generated with *resampleRegions* in  
326 *regioneR*, with equivalent means and standard deviations. We compiled a set of key genes and  
327 genomic regions identified in previous mammalian PAE studies for site-specific testing based  
328 on our prior systematic review of the literature (15), which identified 37 candidate genes  
329 (Tables S5-6). The brain and liver datasets were filtered to candidate gene regions and  
330 differential testing was then performed across the entire coding sequence, separately in the  
331 brain and liver of the mice on a normal diet using the *callDML* feature in *DSS*.

332

333 *Validation studies in human cohorts*

334 Validation studies in human cohorts with existing genome-wide DNA methylation data sets  
335 and matching PAE data are described in the Supplementary Material. Briefly, Illumina Human  
336 Methylation array .iDAT files were pre-processed using the *minfi* package (36) from the  
337 Bioconductor project (<http://www.bioconductor.org>) in the R statistical environment  
338 (<http://cran.r-project.org/>, version 4.2.2). Sample quality was assessed using control probes on  
339 the array. Between-array normalization was performed using the stratified quantile method to  
340 correct for Type 1 and Type 2 probe bias. Probes exhibiting a *P*-detection call rate of  $>0.01$  in  
341 one or more samples were removed prior to analysis. Probes containing SNPs at the single base  
342 extension site, or at the CpG assay site were removed, as were probes measuring non-CpG loci  
343 (32,445 probes). Probes reported to have off-target effects in McCartney et al. (37) were also  
344 removed. Mouse DMRs were converted into human equivalent regions using an mm10 to hg19  
345 genome conversion with the liftover tool in the UCSC Genome Browser (38). A minimum 0.1  
346 ratio of bases that must remap was specified as recommended for liftover between regions from  
347 different species and multiple output regions were allowed. Differential testing of candidate  
348 mouse DMRs was carried out using the R package *DMRcate* (39) for each dataset and DMRs  
349 were declared as minimum smoothed false-discovery rate (FDR)  $< 0.05$ .

350

### 351 **Data Availability Statement**

352 The mouse whole-genome bisulfite sequencing data will be available on the GEO repository  
353 at <http://ncbi.nlm.nih.gov/geo>. The human array data used in the validation study is not publicly  
354 available due to privacy and ethical restrictions.

355

### 356 **Conflict of Interest Statement**

357 The authors declare no conflicts of interest.

## 358 **Author Contributions**

359 D. Martino, M. Symons, A. Larcombe, R. Lister, D. Hutchinson, E. Muggli, J. Craig, J.  
360 Halliday, J. Fitzpatrick, S. Buckberry, M. Bestry and E. Elliott contributed to the study design  
361 and funding application. E. Chivers, A. Larcombe performed the mouse work including  
362 administering the mating, treatments, measurements, monitoring and extracting biological  
363 samples. E. Chivers, A. Larcombe and M. Bestry performed the mouse behavioural testing. C.  
364 Bakker analysed the videos from the mouse behavioural testing. M. Bestry prepared the whole-  
365 genome bisulfite sequencing libraries and performed the data analyses. N. Kresoje assisted with  
366 preparing whole-genome bisulfite sequencing libraries. S. Buckberry and D. Martino provided  
367 advice and support on the data analysis. J. Halliday and E. Muggli contributed human datasets  
368 for reproducibility analysis. M. Bestry and D. Martino drafted the manuscript. M. Symons, A.  
369 Larcombe, R. Lister, D. Hutchinson, E. Muggli, J. Craig, J. Halliday, J. Fitzpatrick, S.  
370 Buckberry, E. Elliott and N. Kresoje contributed to the development and editing of the  
371 manuscript.

372

## 373 **Acknowledgements**

374 We wish to acknowledge the assistance of Dr Jahnavi Pflueger who provided training on  
375 preparation of whole-genome bisulfite sequencing libraries. We wish to acknowledge the  
376 financial contribution of the Centre for Research Excellence in FASD who supported the  
377 murine experiments.

378

## 379 **References**

380 1. Popova S, Charness ME, Burd L, Crawford A, Hoyne HE, Mukherjee RAS, et al. Fetal alcohol  
381 spectrum disorders. *Nat Rev Dis Primers*. 2023;9(1):11.



- 382 2. Jacobson JL, Akkaya-Hocagil T, Ryan LM, Dodge NC, Richardson GA, Olson HC, et al. Effects of  
383 prenatal alcohol exposure on cognitive and behavioral development: Findings from a hierarchical  
384 meta-analysis of data from six prospective longitudinal U.S. cohorts. *Alcohol Clin Exp Res.*  
385 2021;45(10):2040-58.
- 386 3. Sambo D, Goldman D. Genetic Influences on Fetal Alcohol Spectrum Disorder. *Genes (Basel).*  
387 2023;14(1).
- 388 4. Chung DD, Pinson MR, Bhenderu LS, Lai MS, Patel RA, Miranda RC. Toxic and Teratogenic  
389 Effects of Prenatal Alcohol Exposure on Fetal Development, Adolescence, and Adulthood. *Int J Mol*  
390 *Sci.* 2021;22(16).
- 391 5. Tsang TW, Kingsland M, Doherty E, Anderson AE, Tully B, Crooks K, et al. Predictors of  
392 alcohol use during pregnancy in Australian women. *Drug Alcohol Rev.* 2022;41(1):171-81.
- 393 6. McCormack C, Hutchinson D, Burns L, Wilson J, Elliott E, Allsop S, et al. Prenatal Alcohol  
394 Consumption Between Conception and Recognition of Pregnancy. *Alcohol Clin Exp Res.*  
395 2017;41(2):369-78.
- 396 7. Jin Z, Liu Y. DNA methylation in human diseases. *Genes Dis.* 2018;5(1):1-8.
- 397 8. Fransquet PD, Hutchinson D, Olsson CA, Wilson J, Allsop S, Najman J, et al. Perinatal  
398 maternal alcohol consumption and methylation of the dopamine receptor DRD4 in the offspring: the  
399 Triple B study. *Environ Epigenet.* 2016;2(4):dvw023.
- 400 9. Lussier AA, Morin AM, MacIsaac JL, Salmon J, Weinberg J, Reynolds JN, et al. DNA  
401 methylation as a predictor of fetal alcohol spectrum disorder. *Clinical Epigenetics.* 2018;10.
- 402 10. Masemola ML, van der Merwe L, Lombard Z, Viljoen D, Ramsay M. Reduced DNA  
403 methylation at the PEG3 DMR and KvDMR1 loci in children exposed to alcohol in utero: a South  
404 African Fetal Alcohol Syndrome cohort study. *Front Genet.* 2015;6:85.
- 405 11. Jarmasz JS, Basalah D, Del Bigio MR, Stirton H, Davie JR, Clarren SK, et al. Global DNA  
406 Methylation and Histone Posttranslational Modifications in Human and Nonhuman Primate Brain in  
407 Association with Prenatal Alcohol Exposure. *Alcoholism: Clinical & Experimental Research.*  
408 2019;43(6):1145-62.
- 409 12. Chen YY, Ozturk NC, Zhou FC. DNA Methylation Program in Developing Hippocampus and Its  
410 Alteration by Alcohol. *PLoS One.* 2013;8(3).
- 411 13. Abbott CW, Rohac DJ, Bottom RT, Patadia S, Huffman KJ. Prenatal Ethanol Exposure and  
412 Neocortical Development: A Transgenerational Model of FASD. *Cereb Cortex.* 2018;28(8):2908-21.
- 413 14. Downing C, Johnson TE, Larson C, Leakey TI, Siegfried RN, Rafferty TM, et al. Subtle  
414 decreases in DNA methylation and gene expression at the mouse *Igf2* locus following prenatal  
415 alcohol exposure: effects of a methyl-supplemented diet. *Alcohol.* 2011;45(1):65-71.
- 416 15. Bestry M, Symons M, Larcombe A, Muggli E, Craig JM, Hutchinson D, et al. Association of  
417 prenatal alcohol exposure with offspring DNA methylation in mammals: a systematic review of the  
418 evidence. *Clin Epigenetics.* 2022;14(1):12.
- 419 16. Chen YL, Yang SS, Peng HC, Hsieh YC, Chen JR, Yang SC. Folate and vitamin B12 improved  
420 alcohol-induced hyperhomocysteinemia in rats. *Nutrition.* 2011;27(10):1034-9.
- 421 17. Hutson JR, Stade B, Lehotay DC, Collier CP, Kapur BM. Folic acid transport to the human  
422 fetus is decreased in pregnancies with chronic alcohol exposure. *PLoS One.* 2012;7(5):e38057.
- 423 18. Nguyen TT, Risbud RD, Mattson SN, Chambers CD, Thomas JD. Randomized, double-blind,  
424 placebo-controlled clinical trial of choline supplementation in school-aged children with fetal alcohol  
425 spectrum disorders. *Am J Clin Nutr.* 2016;104(6):1683-92.
- 426 19. Wozniak JR, Fink BA, Fuglestad AJ, Eckerle JK, Boys CJ, Sandness KE, et al. Four-year follow-  
427 up of a randomized controlled trial of choline for neurodevelopment in fetal alcohol spectrum  
428 disorder. *J Neurodev Disord.* 2020;12(1):9.
- 429 20. Jacobson SW, Carter RC, Molteno CD, Stanton ME, Herbert JS, Lindinger NM, et al. Efficacy of  
430 Maternal Choline Supplementation During Pregnancy in Mitigating Adverse Effects of Prenatal  
431 Alcohol Exposure on Growth and Cognitive Function: A Randomized, Double-Blind, Placebo-  
432 Controlled Clinical Trial. *Alcohol Clin Exp Res.* 2018;42(7):1327-41.

- 433 21. Thomas JD, Abou EJ, Dominguez HD. Prenatal choline supplementation mitigates the  
434 adverse effects of prenatal alcohol exposure on development in rats. *Neurotoxicol Teratol.*  
435 2009;31(5):303-11.
- 436 22. Muggli E, O'Leary C, Donath S, Orsini F, Forster D, Anderson PJ, et al. "Did you ever drink  
437 more?" A detailed description of pregnant women's drinking patterns. *BMC Public Health.*  
438 2016;16:683.
- 439 23. Zakhari S. Overview: how is alcohol metabolized by the body? *Alcohol Res Health.*  
440 2006;29(4):245-54.
- 441 24. Kaminen-Ahola N, Ahola A, Maga M, Mallitt KA, Fahey P, Cox TC, et al. Maternal Ethanol  
442 Consumption Alters the Epigenotype and the Phenotype of Offspring in a Mouse Model. *Plos*  
443 *Genetics.* 2010;6(1).
- 444 25. Seibenhener ML, Wooten MC. Use of the Open Field Maze to measure locomotor and  
445 anxiety-like behavior in mice. *J Vis Exp.* 2015(96):e52434.
- 446 26. Lueptow LM. Novel Object Recognition Test for the Investigation of Learning and Memory in  
447 Mice. *J Vis Exp.* 2017(126).
- 448 27. Murai T, Okuda S, Tanaka T, Ohta H. Characteristics of object location memory in mice:  
449 Behavioral and pharmacological studies. *Physiol Behav.* 2007;90(1):116-24.
- 450 28. Komada M, Takao K, Miyakawa T. Elevated plus maze for mice. *J Vis Exp.* 2008(22).
- 451 29. Deacon RM. Measuring motor coordination in mice. *J Vis Exp.* 2013(75):e2609.
- 452 30. Guo W, Fiziev P, Yan W, Cokus S, Sun X, Zhang MQ, et al. BS-Seeker2: a versatile aligning  
453 pipeline for bisulfite sequencing data. *BMC Genomics.* 2013;14:774.
- 454 31. Guo W, Zhu P, Pellegrini M, Zhang MQ, Wang X, Ni Z. CGmapTools improves the precision of  
455 heterozygous SNV calls and supports allele-specific methylation detection and visualization in  
456 bisulfite-sequencing data. *Bioinformatics.* 2018;34(3):381-7.
- 457 32. R Core Team. R: A Language and Environment for Statistical Computing. Vienna, Austria: R  
458 Foundation for Statistical Computing; 2021.
- 459 33. Wu H, Xu T, Feng H, Chen L, Li B, Yao B, et al. Detection of differentially methylated regions  
460 from whole-genome bisulfite sequencing data without replicates. *Nucleic Acids Res.*  
461 2015;43(21):e141.
- 462 34. Subramanian A, Tamayo P, Mootha VK, Mukherjee S, Ebert BL, Gillette MA, et al. Gene set  
463 enrichment analysis: a knowledge-based approach for interpreting genome-wide expression profiles.  
464 *Proc Natl Acad Sci U S A.* 2005;102(43):15545-50.
- 465 35. Luo Y, Hitz BC, Gabdank I, Hilton JA, Kagda MS, Lam B, et al. New developments on the  
466 Encyclopedia of DNA Elements (ENCODE) data portal. *Nucleic Acids Res.* 2020;48(D1):D882-D9.
- 467 36. Aryee MJ, Jaffe AE, Corrada-Bravo H, Ladd-Acosta C, Feinberg AP, Hansen KD, et al. Minfi: a  
468 flexible and comprehensive Bioconductor package for the analysis of Infinium DNA methylation  
469 microarrays. *Bioinformatics.* 2014;30(10):1363-9.
- 470 37. McCartney DL, Walker RM, Morris SW, McIntosh AM, Porteous DJ, Evans KL. Identification of  
471 polymorphic and off-target probe binding sites on the Illumina Infinium MethylationEPIC BeadChip.  
472 *Genom Data.* 2016;9:22-4.
- 473 38. Kent WJ, Sugnet CW, Furey TS, Roskin KM, Pringle TH, Zahler AM, et al. The human genome  
474 browser at UCSC. *Genome Res.* 2002;12(6):996-1006.
- 475 39. Peters TJ, Buckley MJ, Chen Y, Smyth GK, Goodnow CC, Clark SJ. Calling differentially  
476 methylated regions from whole genome bisulphite sequencing with DMRcate. *Nucleic Acids Res.*  
477 2021;49(19):e109.
- 478 40. Muggli E, Halliday J, Elliott EJ, Penington A, Thompson D, Spittle AJ, et al. Cohort profile:  
479 early school years follow-up of the Asking Questions about Alcohol in Pregnancy Longitudinal Study  
480 in Melbourne, Australia (AQUA at 6). *BMJ Open.* 2022;12(1):e054706.
- 481 41. Indencleef K, Hoskens H, Lee MK, White JD, Liu C, Eller RJ, et al. The Intersection of the  
482 Genetic Architectures of Orofacial Clefts and Normal Facial Variation. *Front Genet.* 2021;12:626403.

- 483 42. Okbay A, Wu Y, Wang N, Jayashankar H, Bennett M, Nehzati SM, et al. Polygenic prediction  
484 of educational attainment within and between families from genome-wide association analyses in 3  
485 million individuals. *Nat Genet.* 2022;54(4):437-49.
- 486 43. Davies G, Lam M, Harris SE, Trampush JW, Luciano M, Hill WD, et al. Author Correction:  
487 Study of 300,486 individuals identifies 148 independent genetic loci influencing general cognitive  
488 function. *Nat Commun.* 2019;10(1):2068.
- 489 44. Consortium ASDWGoTPG. Meta-analysis of GWAS of over 16,000 individuals with autism  
490 spectrum disorder highlights a novel locus at 10q24.32 and a significant overlap with schizophrenia.  
491 *Mol Autism.* 2017;8:21.
- 492 45. Marjonen H, Toivonen M, Lahti L, Kaminen-Ahola N. Early prenatal alcohol exposure alters  
493 imprinted gene expression in placenta and embryo in a mouse model. *PLoS One.*  
494 2018;13(5):e0197461.
- 495 46. Stouder C, Somm E, Paoloni-Giacobino A. Prenatal exposure to ethanol: a specific effect on  
496 the H19 gene in sperm. *Reprod Toxicol.* 2011;31(4):507-12.
- 497 47. Konkořová J, Petrovič R, Chandoga J, Halasová E, Jungová P, Böhmer D. A novel mutation in  
498 the PEX12 gene causing a peroxisomal biogenesis disorder. *Mol Biol Rep.* 2015;42(9):1359-63.
- 499 48. Thomas JD, Biane JS, O'Bryan KA, O'Neill TM, Dominguez HD. Choline supplementation  
500 following third-trimester-equivalent alcohol exposure attenuates behavioral alterations in rats.  
501 *Behav Neurosci.* 2007;121(1):120-30.
- 502 49. Thomas JD, La Fiette MH, Quinn VR, Riley EP. Neonatal choline supplementation ameliorates  
503 the effects of prenatal alcohol exposure on a discrimination learning task in rats. *Neurotoxicol*  
504 *Teratol.* 2000;22(5):703-11.
- 505 50. Otero NK, Thomas JD, Saski CA, Xia X, Kelly SJ. Choline supplementation and DNA  
506 methylation in the hippocampus and prefrontal cortex of rats exposed to alcohol during  
507 development. *Alcohol Clin Exp Res.* 2012;36(10):1701-9.

508

509 **Table 1: Table of DMRs identified in the intronic regions of genes that contained DMRs**  
510 **in 561 both the brain and liver.**  $\Delta$ meth indicates the percentage change in average  
511 methylation level 562 within the DMR with PAE compared to non-PAE mice.

| Gene          | Tissue | Intronic DMR             | $\Delta$ meth | P-value |
|---------------|--------|--------------------------|---------------|---------|
| <i>Auts2</i>  | Brain  | chr5:131510296-131510465 | -23.5%        | <0.05   |
| <i>Auts2</i>  | Liver  | chr5:131621828-131621999 | -22.5%        | <0.05   |
| <i>Adgb</i>   | Brain  | chr10:104555557-10455883 | -25.0%        | <0.05   |
| <i>Adgb</i>   | Liver  | chr10:103533338-10353613 | -25.9%        | <0.05   |
| <i>Rbfox1</i> | Brain  | chr16:6813039-6813217    | -24.3%        | <0.05   |
| <i>Rbfox1</i> | Liver  | chr16:6781985-6782330    | -22.6%        | <0.05   |

512

513 **Table 2. Number and percentage of brain and liver DMRs that overlap with tissue-**  
514 **specific regulatory regions.** ATAC-seq, H3K4me1 and H3K27ac regions were obtained at 0  
515 days postnatal from the ENCODE database. P-values for permutation testing using a  
516 randomisation strategy.

| <b>Assay type</b> | <b>Brain DMRs</b>          | <b>Brain randomised regions</b> | <b>Liver DMRs</b>          | <b>Liver randomised regions</b> |
|-------------------|----------------------------|---------------------------------|----------------------------|---------------------------------|
| ATAC-seq          | 21/78 (26.92%)<br>P = 0.01 | 1/78 (1.28%)<br>P = 0.16        | 53/759 (6.98%)<br>P = 0.01 | 22/759 (2.90%)<br>P = 0.31      |
| H3K4me1           | 4/78 (5.13%)<br>P = 0.03   | 2/78 (2.56%)<br>P = 0.18        | 38/759 (5.01%)<br>P = 0.05 | 35/759 (4.61%)<br>P = 0.32      |
| H3K27ac           | 9/78 (11.54%)<br>P = 0.01  | 2/78 (2.56%)<br>P = 0.74        | 48/759 (6.32%)<br>P = 0.01 | 19/759 (2.50%)<br>P = 0.26      |

517

518

519

520

521

522

523

524

525

526 **Table 3. DMRs identified in the murine model that were validated in the Lussier et al.**  
 527 **human case-control cohort for a clinical diagnosis of FASD.** The upper section describes  
 528 properties of Lussier et al. human DMRs. The lower section describes properties of the  
 529 equivalent murine model DMRs.

| DMR | organism | tissue | chr | start     | end       | width | no. cpgs | FDR      | meandiff  | gene                                  |
|-----|----------|--------|-----|-----------|-----------|-------|----------|----------|-----------|---------------------------------------|
| 1   | human    | buccal | 1   | 68151571  | 68152310  | 740   | 5        | 0.028636 | -0.00497  | <i>GADD45A</i>                        |
| 2   | human    | buccal | 19  | 13000782  | 13002357  | 1576  | 11       | 0.000197 | -0.00203  | <i>GCDH</i>                           |
| 3   | human    | buccal | 7   | 33148815  | 33149316  | 502   | 11       | 0.001149 | -0.00011  | <i>RP9</i>                            |
| 4   | human    | buccal | 17  | 33905444  | 33905888  | 445   | 14       | 0.000171 | -0.00359  | <i>AP2B1, PE<br/>X12</i>              |
| 5   | human    | buccal | 17  | 27181503  | 27182342  | 840   | 11       | 0.018536 | -0.00246  | <i>ERAL1, FA<br/>M222B</i>            |
| 6   | human    | buccal | 19  | 12992181  | 12992479  | 299   | 9        | 0.037431 | -0.00179  | <i>CTD-<br/>2265021.7,<br/>DNASE2</i> |
| 7   | human    | buccal | 19  | 11849531  | 11850013  | 483   | 9        | 0.022724 | -0.00244  | <i>ZNF823</i>                         |
|     |          |        |     |           |           |       |          |          |           |                                       |
| 1   | mouse    | liver  | 6   | 67034885  | 67035082  | 197   | 4        | <0.05    | -0.220833 | <i>E230016M1<br/>IRik</i>             |
| 2   | mouse    | liver  | 8   | 84901298  | 84901544  | 246   | 5        | <0.05    | -0.234457 | <i>Klf1</i>                           |
| 3   | mouse    | liver  | 9   | 22453836  | 22453893  | 57    | 5        | <0.05    | -0.226427 | <i>Rp9</i>                            |
| 4   | mouse    | brain  | 14  | 21403570  | 21403622  | 52    | 4        | <0.05    | -0.234193 | <i>Adk</i>                            |
| 5   | mouse    | liver  | 11  | 78069463  | 78070002  | 539   | 9        | <0.05    | -0.255864 | <i>Mir144,<br/>Mir451a</i>            |
| 6   | mouse    | liver  | 11  | 78072079  | 78072313  | 234   | 4        | <0.05    | -0.215227 | <i>Mir144,<br/>Mir451a</i>            |
| 7   | mouse    | liver  | 2   | 177091927 | 177092945 | 1018  | 5        | <0.05    | -0.224354 | Intergenic                            |

530

531

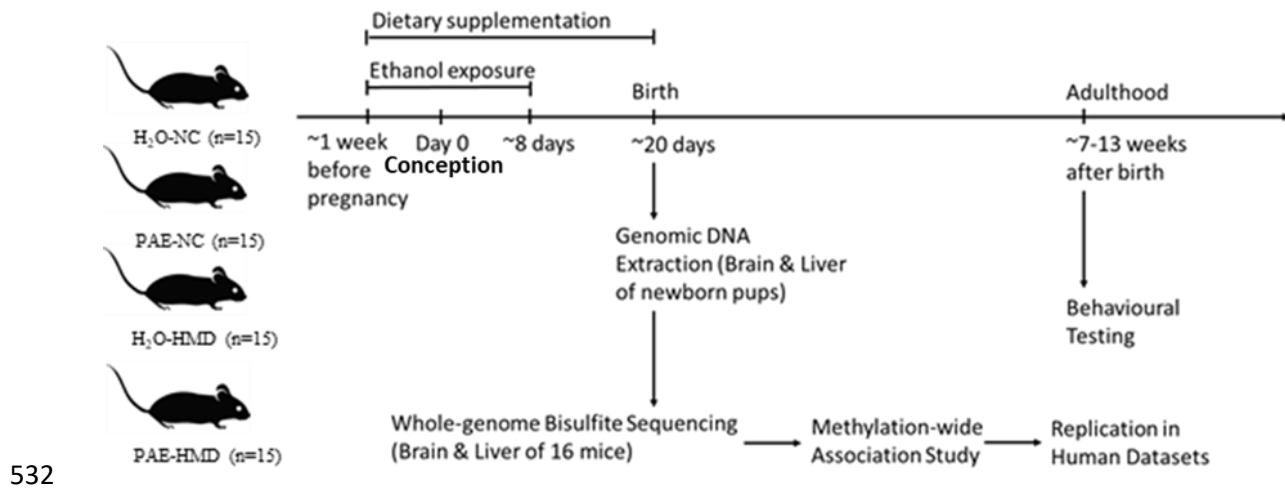

533 **Figure 1. Overview of PAE model.**

534 A schematic representation of the experiment design is shown in figure 1. Fifteen dams were  
535 allocated to each treatment group. Prenatal alcohol exposure (PAE) mice were exposed to  
536 ethanol (10% v/v in non-acidified reverse osmosis drinking water *ad libitum*) from one week  
537 before pregnancy to gestational days 8-10 and the remaining mice received water (H<sub>2</sub>O). The  
538 PAE and H<sub>2</sub>O groups received either normal chow (NC) or a high methyl donor (HMD) diet  
539 (NC containing 20 mg/kg folate and 4970 mg/kg choline) from one week before pregnancy  
540 until birth.

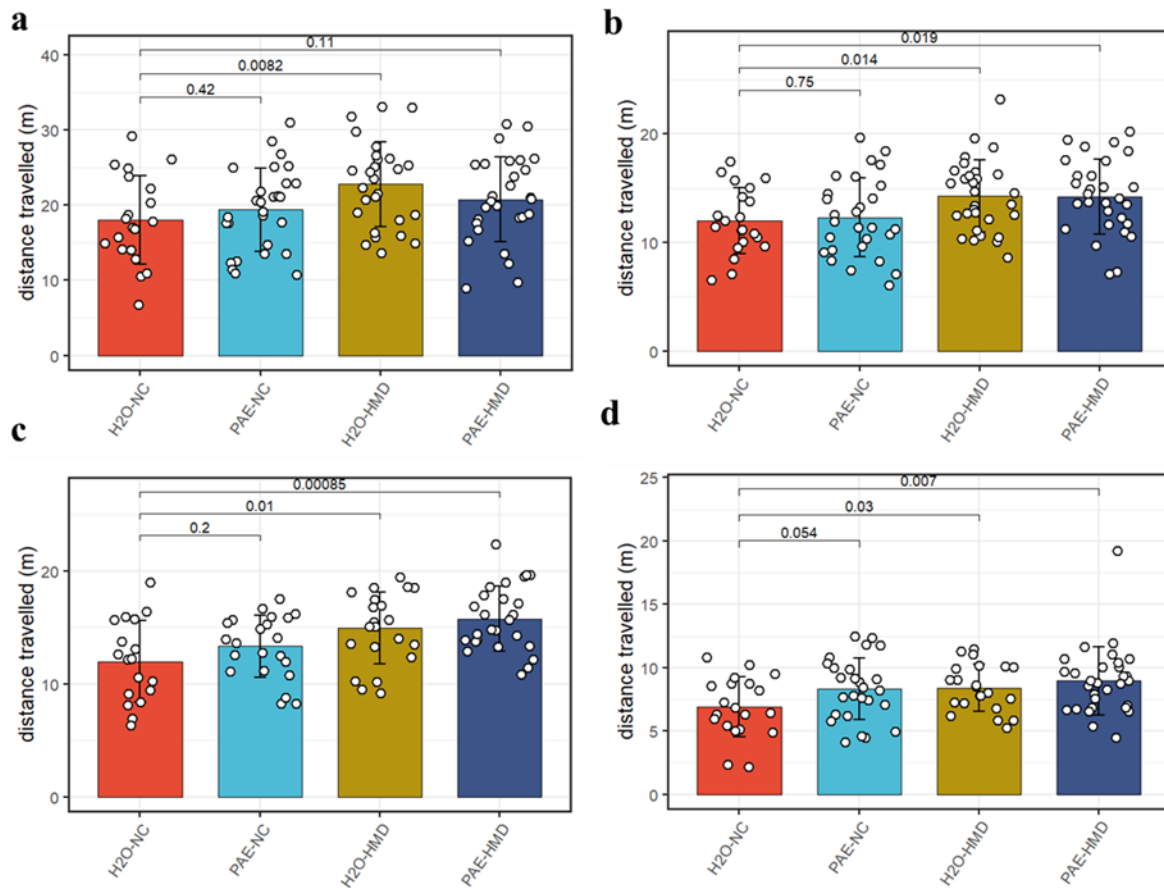

541

542 **Figure 2. HMD was associated with increased locomotor activity.**

543 HMD was associated with increased locomotor activity compared to NC, indicated by  
544 significantly greater total distance travelled in the (a) open field test (sex  $P = 0.0568$ ), (b) object  
545 recognition test (sex  $P = 0.1519$ ), (c) elevated plus maze test (sex  $P = 0.2043$ ), and (d) object  
546 in place test (sex  $P = 0.1639$ ) by unpaired t-test. Bars show mean and standard deviation. Each  
547 point represents one mouse. NC = normal chow, HMD = high methyl diet, PAE = prenatal  
548 alcohol exposure. Time interval for each mouse was (a-c) 300 seconds and (d) 180 seconds.  
549 The p-value (Sex  $P$ ) represents the statistical significance of the association between sex and  
550 the behavioral outcome. It was calculated using a two-way ANOVA that included PAE status  
551 and HMD status as factors, without considering any interactions.

552



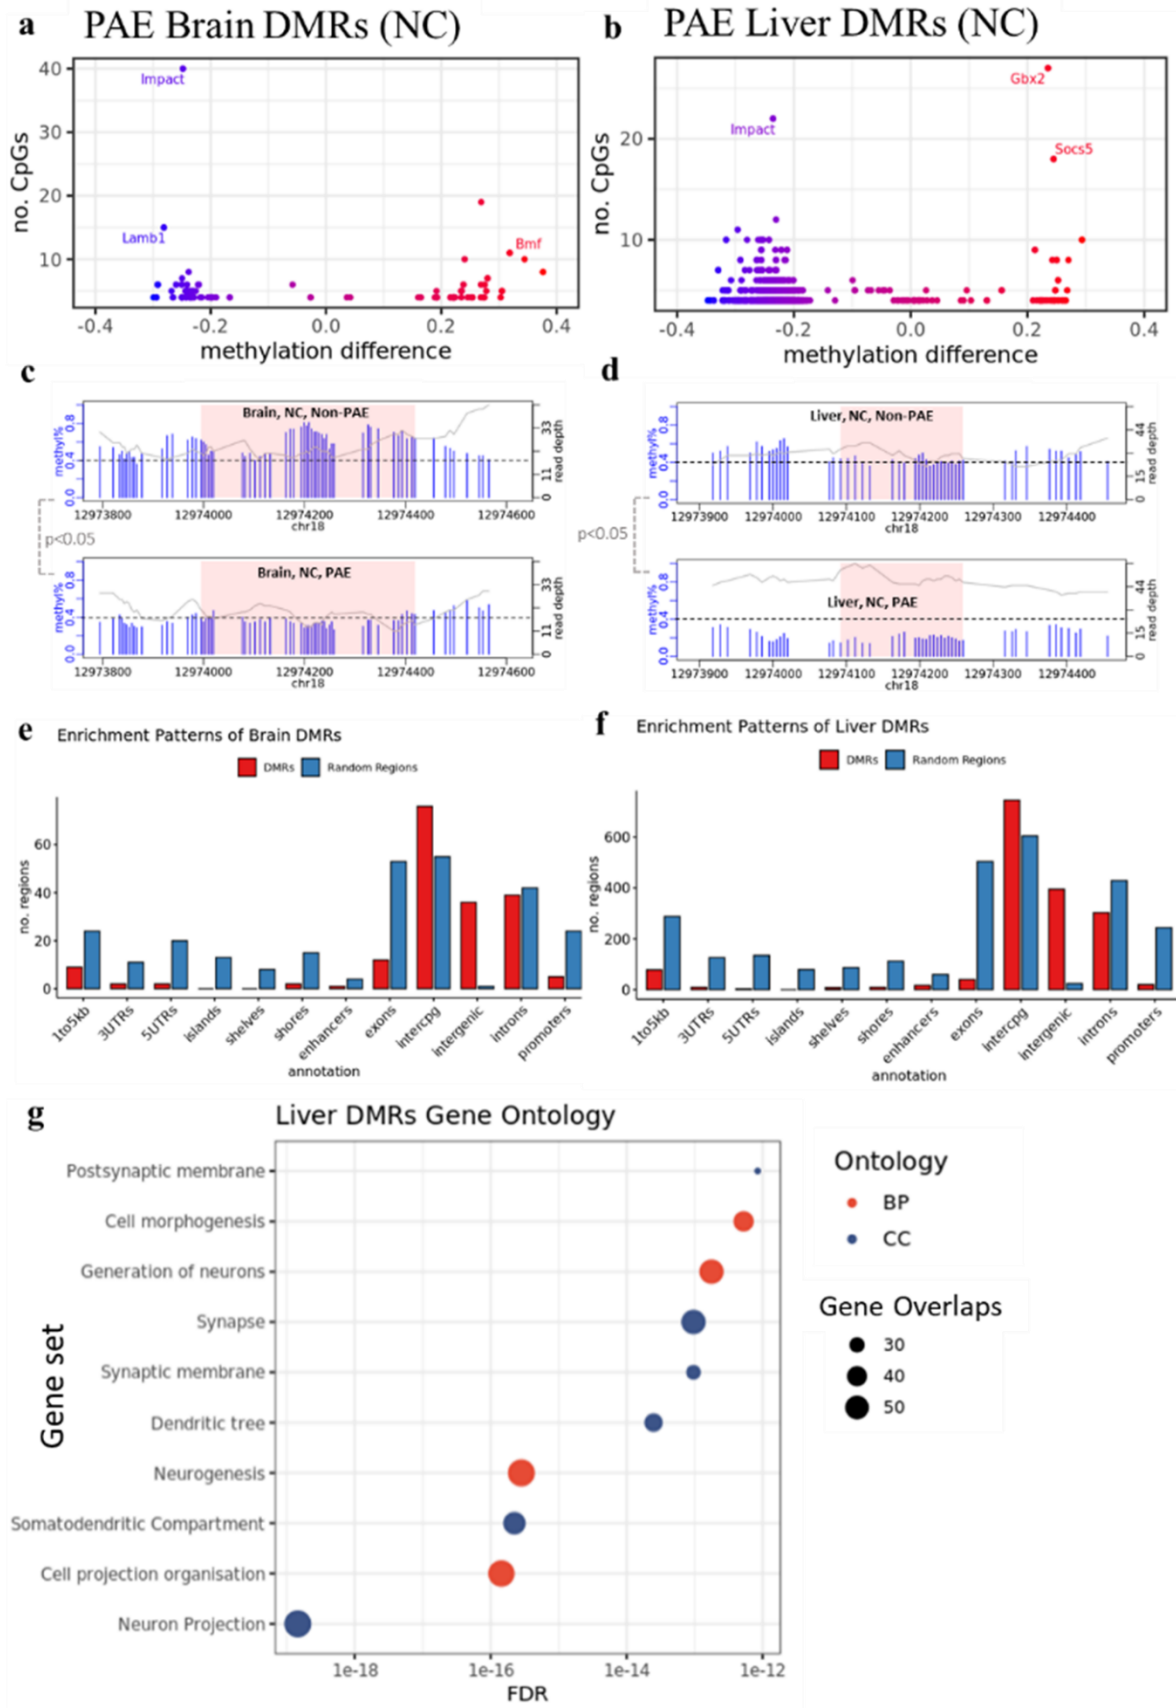



555 **Figure 3. PAE was associated with site-specific differences in offspring DNA methylation.**

556 The majority of DMRs were hypomethylated with PAE in (a) brain and (b) liver of mice given  
557 normal chow. Each point represents one DMR. Point colour indicates change in DNA  
558 methylation with PAE. PAE was also associated with hypomethylation in the DMRs identified  
559 in the promoter of the *Impact* gene in (c) brain and (d) liver, within NC mice. Each plot  
560 represents a separate treatment group. Each blue vertical line indicates a CpG site, with the  
561 height and corresponding left y-axis indicating the methylation ratio. The grey line and  
562 corresponding right y-axis indicate coverage at each CpG site. The black horizontal dotted line  
563 indicates 40% methylation for comparison purposes. The x-axis indicates the base position on  
564 chromosome 18, with the pink shaded area highlighting the DMR. DMR plots include 200 base  
565 pair flanking regions on each side of the DMR. DMRs identified in (e) brain and (f) liver were  
566 enriched in intergenic and inter-CpG regions, whilst being underrepresented in CpG and gene  
567 regions. The bar plot compares the number of WGBS DMRs in red to a set of equivalent  
568 randomly generated regions in blue. (g) Gene ontology analysis of liver DMRs shows  
569 enrichment within neuronal cellular components and biological processes. BP/red point =  
570 biological process, CC/blue point = Cellular component. X-axis of point indicates FDR of  
571 ontology. Size of point indicates number of overlapping genes with ontology. There were  
572 insufficient number of DMRs identified in the brain for a gene ontology analysis.

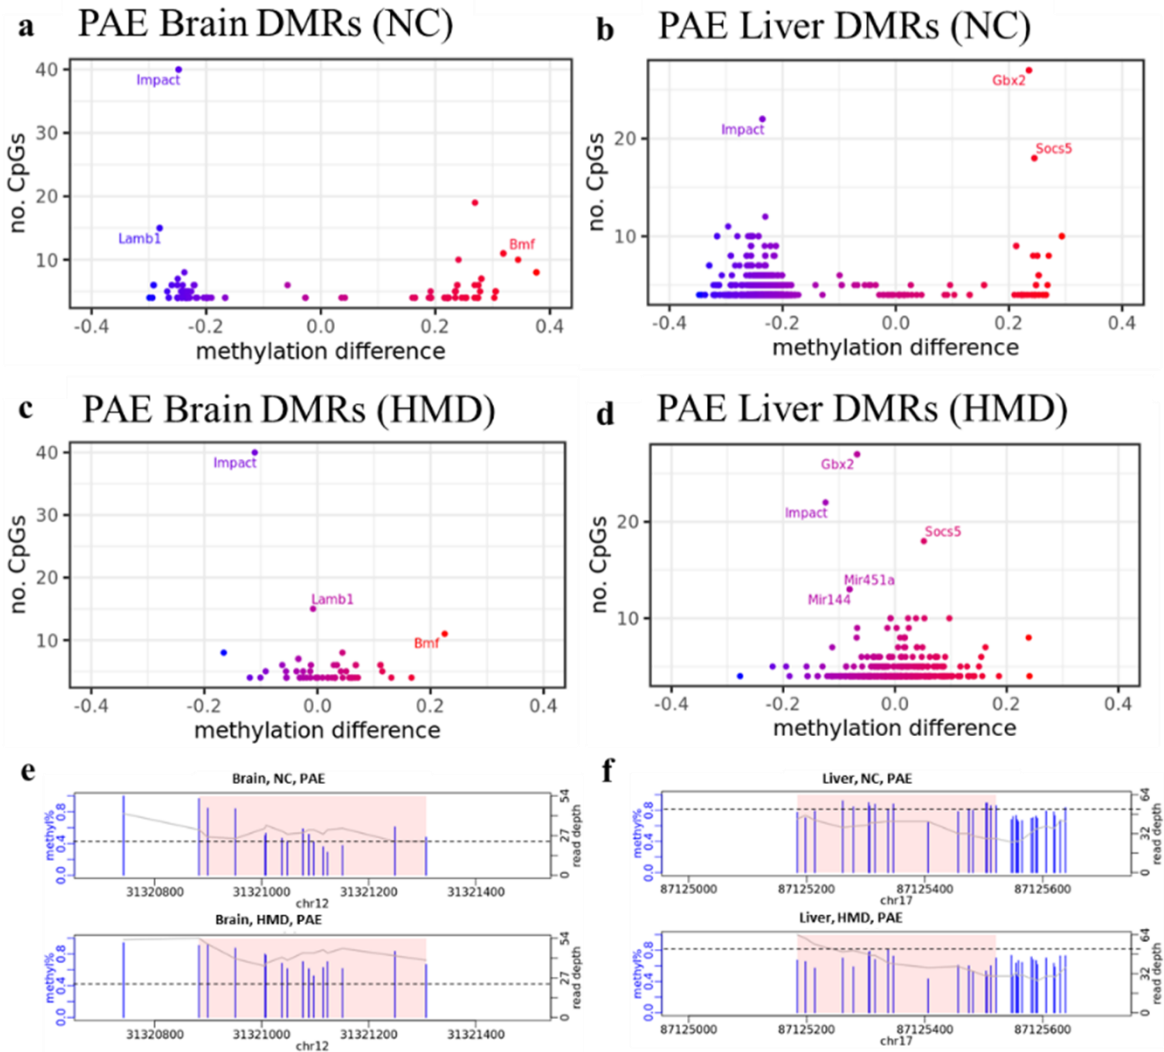

573

574 **Figure 4. HMD partially mitigated effects of PAE on offspring DNA methylation.**

575 Average DNA methylation effect sizes above 30% with PAE were observed in some (a) brain,  
 576 and (b) liver DMRs in NC mice. Mean absolute difference in methylation with PAE is reduced  
 577 within the HMD mice in (c) brain, and (d) liver. Each point represents one DMR. Point colour  
 578 indicates change in DNA methylation with PAE. Points with a high number of CpGs and  
 579 methylation difference are annotated with associated gene if located within a genic region.  
 580 HMD was associated with (e) hypermethylation in the DMR identified proximal to *Lamb1* on  
 581 chromosome 12 in brain and (f) hypomethylation in the DMR identified proximal to *Socs5* on  
 582 chromosome 17 in liver. Each plot represents a separate treatment group. Each blue vertical  
 583 line indicates a CpG site, with the height and corresponding left y-axis indicating the

584 methylation ratio. The grey line and corresponding right y-axis indicate coverage at each CpG  
585 site. The black horizontal line indicates (e) 40% and (f) 80% methylation for comparison  
586 purposes. The x-axis indicates the base position on the chromosome, with the pink shaded area  
587 highlighting the DMR. DMR plots include 200 base pair flanking regions on each side of the  
588 DMR.

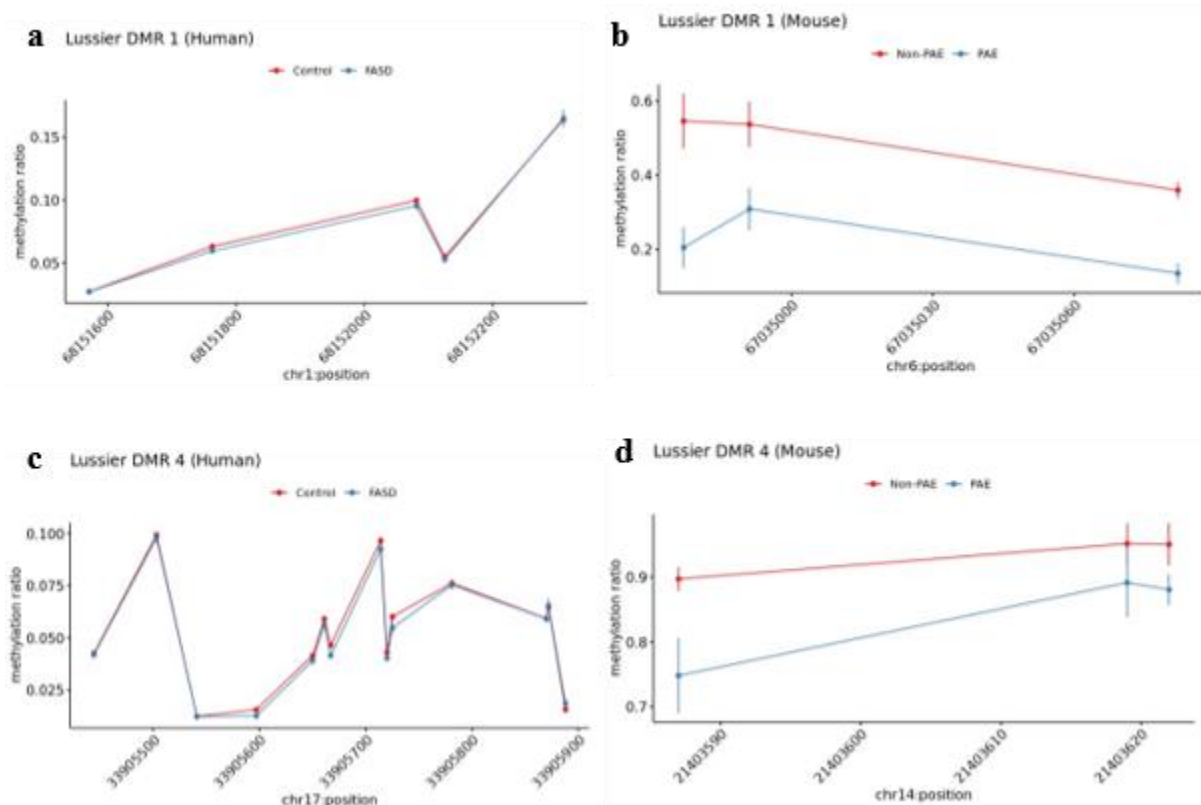

589

590 **Figure 5. Seven PAE DMRs identified in the murine model were successfully replicated**  
591 **in the Lussier et al. human FASD cohort.**

592 Examples of two PAE DMRs that were significantly hypomethylated with a clinical diagnosis  
593 of FASD in the Lussier et al. cohort (a and c), while their mouse liftover DMR was also  
594 significantly hypomethylated with PAE in the murine model experiment (b and d).

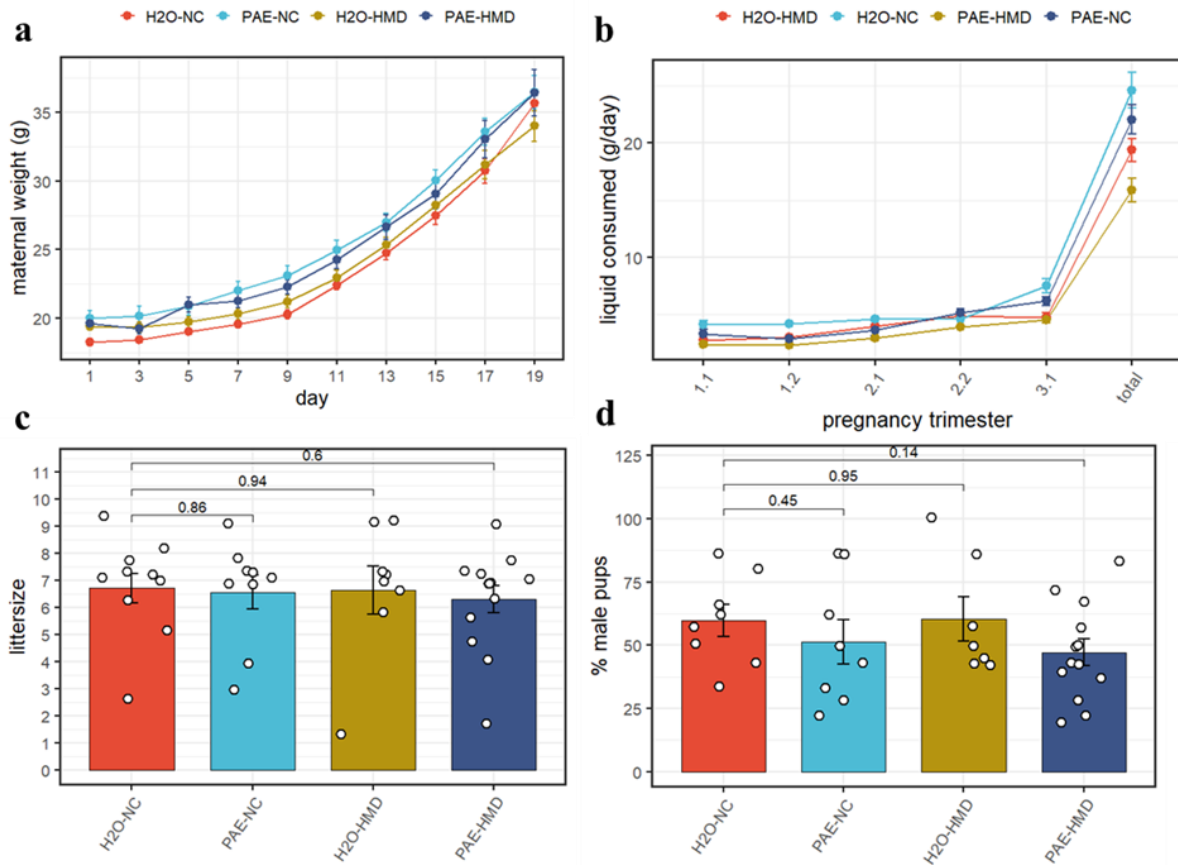

595

596 **Figure S1. PAE and HMD had varied effects on dam characteristics.**

597 (a) Dam weight progression was significantly affected by HMD but not PAE by quadratic  
 598 mixed-effects model without interaction (b) Trajectory of liquid consumption across pregnancy  
 599 was affected by PAE and HMD by quadratic mixed effects model. PAE and HMD significantly  
 600 interacted with trimester of pregnancy. (c) litter size and (d) pup sex ratios were not  
 601 significantly associated with PAE or HMD by unpaired t-test or ANOVA. All line and bar plots  
 602 show mean and standard deviation. NC = normal chow, HMD = high methyl diet, PAE =  
 603 prenatal alcohol exposure. Comparisons show p-value by unpaired t-test compared to the H<sub>2</sub>O-  
 604 NC baseline treatment group.

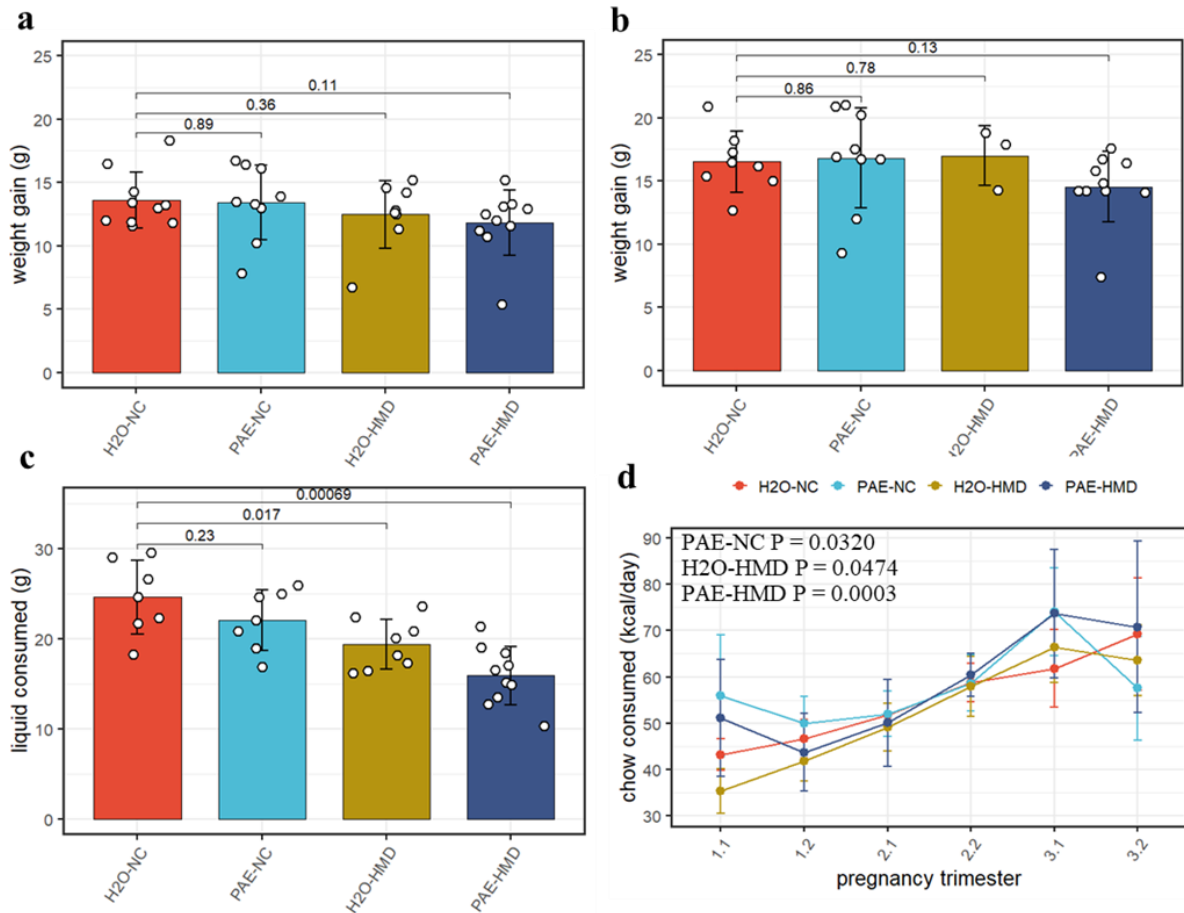

605

606 **Figure S2. PAE and HMD had varied effects on dam characteristics.**

607 There was no significant difference in the average gain of weight in dams between (a) days 1-  
608 17 or (b) days 1-19 by treatment group. Both timepoints were included due to some  
609 pregnancies ending by day 19. (c) Mice given supplemented chow consumed significantly  
610 lower total quantity of liquid across pregnancy. Bar plots show mean and standard deviation  
611 for each treatment group. Each point represents one dam. (d) the trajectory of chow  
612 consumed across pregnancy significantly varied based on treatment group. Points show mean  
613 and standard deviation for each treatment group.

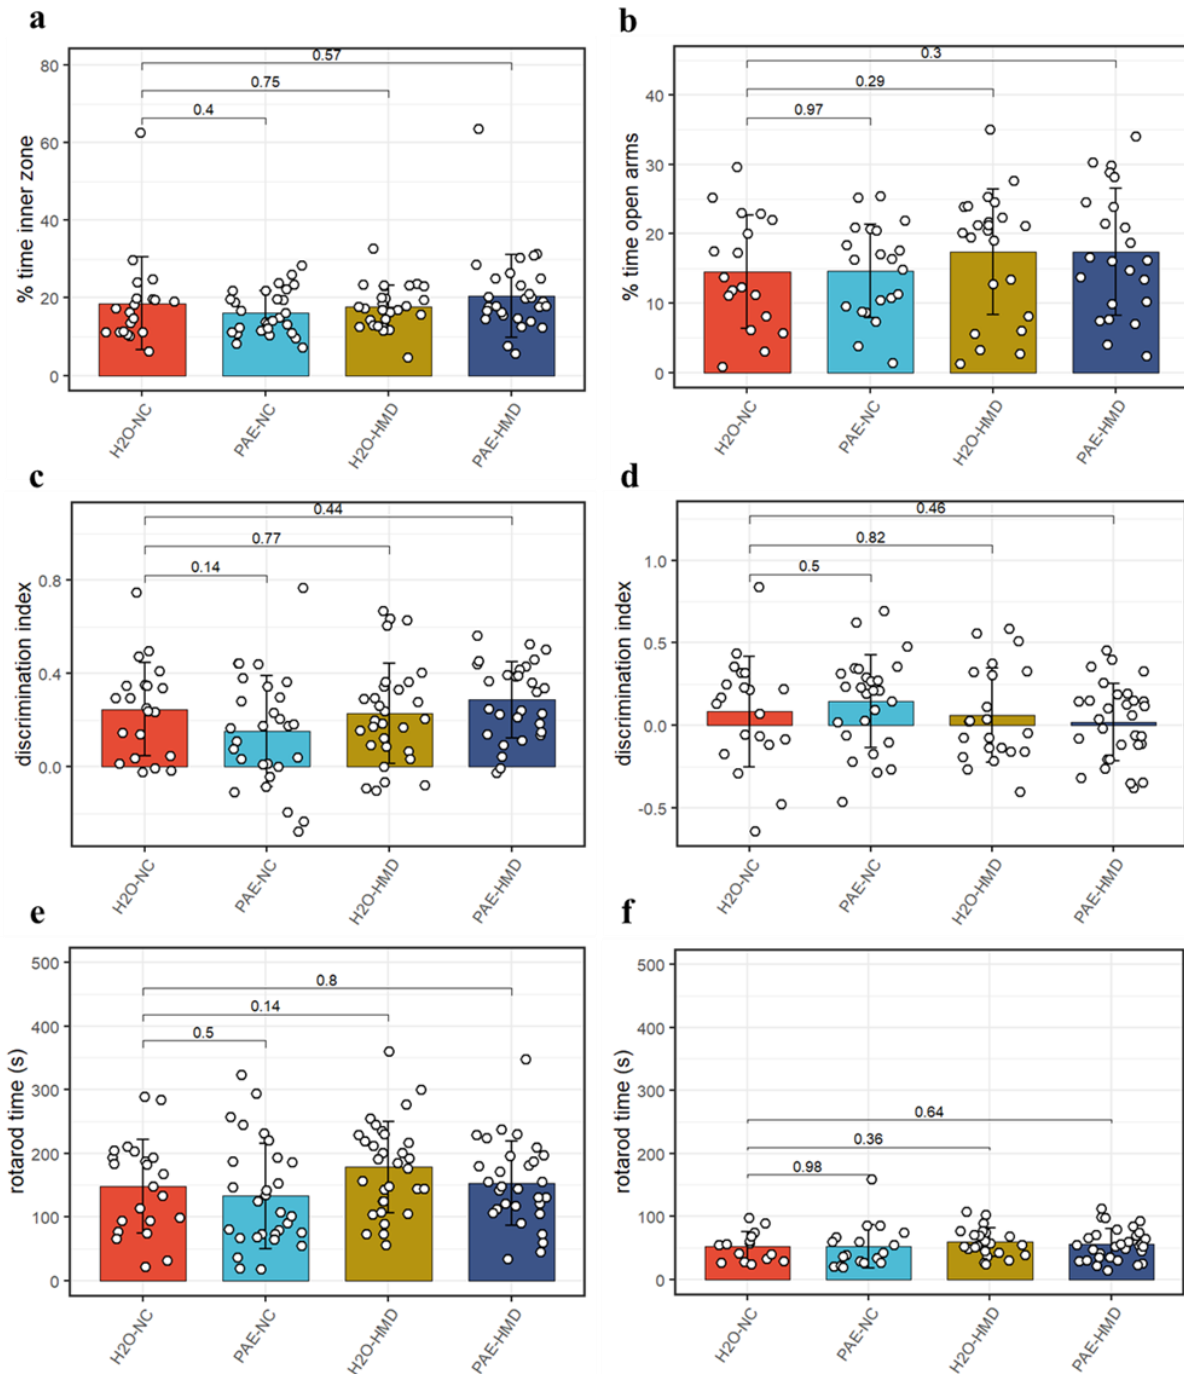

614

615 **Figure S3. PAE had no significant effect on other assessed behavioural outcomes.**

616 PAE and HMD had no significant effect on anxiety as evident by no significant difference by

617 unpaired t-test in the (a) percent time in the inner zone in the open field test (sex  $P = 0.915$ )

618 and (b) percent time open arms in the elevated plus maze test (sex  $P = 0.949$ ). PAE and HMD

619 had no significant effect on spatial recognition as evident by no significant difference by

620 unpaired t-test in the discrimination index in (c) object recognition (sex  $P = 0.396$ ) and (d)

621 object in place test (sex  $P = 0.987$ ). PAE and HMD had no significant effect on motor co-

622 ordination and balance as evident by no significant difference by unpaired t-test in times in

623 (e) first rotarod test (sex  $P = 0.634$ ) and (f) second rotarod test (sex  $P = 0.143$ ). Bars show

624 mean and standard deviation. Each point represents one mouse. NC = normal chow, HMD =

625 high methyl diet, PAE = prenatal alcohol exposure. Time interval for each mouse was (a-c)

626 300 seconds and (d) 180 seconds. The p-value (Sex P) represents the statistical significance

627 of the association between sex and the behavioral outcome. It was calculated using a two-way

628 ANOVA that included PAE status and HMD status as factors, without considering any

629 interactions.

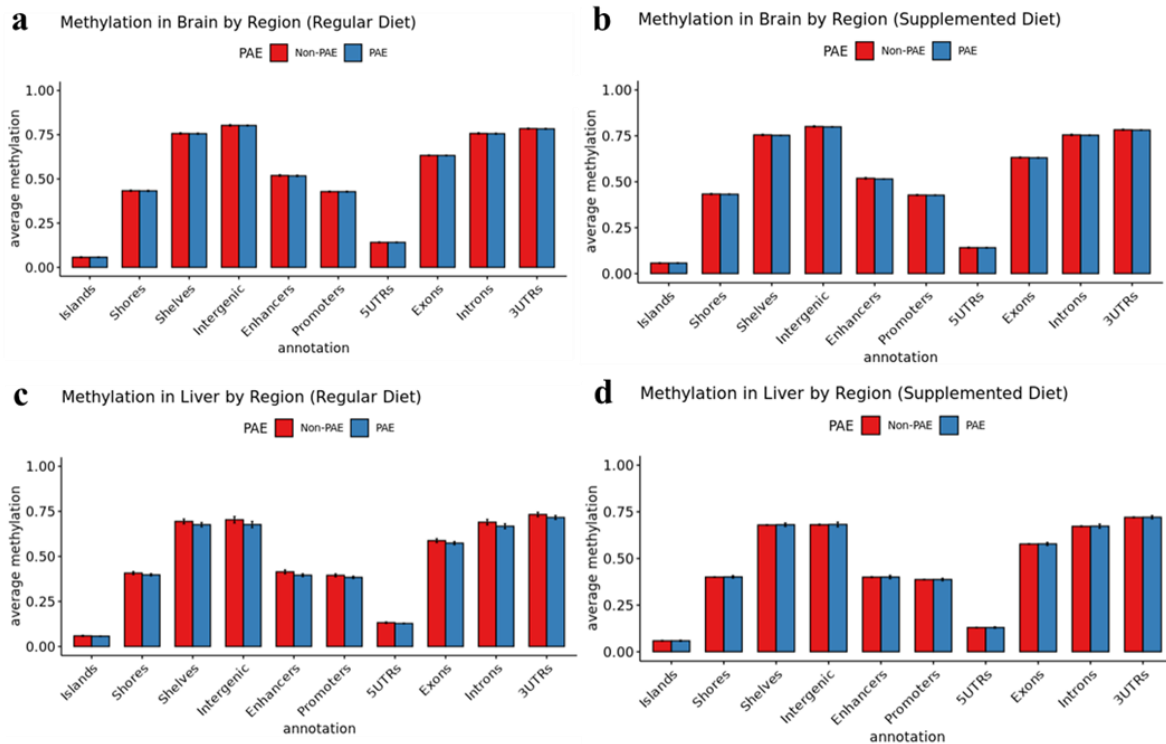

630

631 **Figure S4. Global DNA methylation boxplots.**

632 (a) Across CpG sites that had at least 1X coverage in each sample, DNA methylation was

633 significantly hypomethylated within brain DMRs located in all genic and CpG regions except

634 for intergenic region and 3UTRs, which were significantly hypermethylated from PAE. (b)

635 The equivalent analysis in liver showed significant hypomethylation of DMRs located in all  
636 genic regions except for CpG shelves. No significant results were identified within the  
637 equivalent analysis of (c) brain or (d) liver in mice given supplemented chow.

638 **Table S1. Table of brain DMRs identified by DSS and annotated with *annotatr*.**

639 **Table S2. Table of liver DMRs identified by *DSS* and annotated with *annotatr*.**

640 **Table S3. Table of GSEA ontology results from genes associated with liver DMRs.**

641 **Table S4. GSEA Ontology Gene/Gene Set Overlap Matrix for liver DMRs.**

642 **Table S5. List of genes included in candidate gene analysis.**

643 **Table S6. Table of regions assessed in candidate genes analysis.**

644 **Table S7. Table of brain DMRs having differences to DNA methylation with PAE being  
645 rescued by dietary supplementation.**

646 **Table S8. Table of liver DMRs having differences to DNA methylation with PAE being  
647 rescued by dietary supplementation.**

648 **Table S9. Table of FDR-significant brain DMLs from candidate gene regions in regular  
649 diet mice.**

650 **Table S10. Table of FDR-significant liver DMLs from candidate gene regions in regular  
651 diet mice.**

652
